# Supplementary material
Source: PubMed Central journal article supplement (PMC4764780)
Supplement: ijmsv13p0133s1.pdf [file ijmsv13p0133s1.pdf]

**Supplemental Table 1.** SNPs captured by the selected three *BARD1* polymorphisms as predicted by SNPinfo software

| rs               | Chr      | Allele     | LDsnp            | Pop/LD    | Reg Potential   | Conservation | Nearby Gene                | Distance (bp)       | Allele   | Asian        | CHB          |
|------------------|----------|------------|------------------|-----------|-----------------|--------------|----------------------------|---------------------|----------|--------------|--------------|
| rs17487792       | 2        | C/T        | rs3768716        | CHB/0.804 | 0.144642        | 0            | BARD1                      | 50238  30928        | C        | 0.833        | 0.887        |
| rs17487827       | 2        | C/G        | rs3768716        | CHB/0.804 | 0               | 0.001        | BARD1                      | 51073  30093        | C        | 0.833        | 0.887        |
| rs17488049       | 2        | A/G        | rs3768716        | CHB/0.804 | 0.105359        | 0.997        | BARD1                      | 58488  22678        | G        | 0.833        | 0.887        |
| rs2070096        | 2        | G/C        | rs3768716        | CHB/0.911 | 0.160752        | 0            | BARD1                      | 52283  28883        | C        | 0.842        | 0.856        |
| <b>rs3768716</b> | <b>2</b> | <b>T/C</b> | <b>rs3768716</b> | <b>1</b>  | <b>0</b>        | <b>0.213</b> | <b>BARD1</b>               | <b>42532  38634</b> | <b>T</b> | <b>0.819</b> | <b>0.863</b> |
| <b>rs6435862</b> | <b>2</b> | <b>G/T</b> | <b>rs6435862</b> | <b>1</b>  | <b>0.027119</b> | <b>0.001</b> | <b>BARD1</b>               | <b>79284  1882</b>  | <b>T</b> | <b>0.865</b> | <b>0.899</b> |
| rs6720708        | 2        | A/G        | rs6435862        | CHB/1.000 | NA              | 0            | BARD1                      | 78055  3111         | G        | 0.876        | 0.92         |
| rs12614960       | 2        | C/T        | rs7585356        | CHB/1.000 | 0               | 0.278        | BARD1                      | 2250  78916         | C        | 0.711        | 0.685        |
| rs1374230        | 2        | G/A        | rs7585356        | CHB/1.000 | 0.055041        | 0.001        | BARD1                      | 25517  55649        | A        | 0.697        | 0.685        |
| rs16852600       | 2        | C/T        | rs7585356        | CHB/1.000 | 0.159929        | 0.009        | BARD1                      | 2383  78783         | C        | 0.711        | 0.685        |
| rs1979028        | 2        | A/T        | rs7585356        | CHB/1.000 | 0               | 0            | LOC100128203  BARD1        | -30118  -356        | T        | 0.711        | 0.685        |
| rs2075621        | 2        | T/C        | rs7585356        | CHB/0.972 | 0               | 0.002        | BARD1                      | 24238  56928        | T        | 0.725        | 0.699        |
| <b>rs7585356</b> | <b>2</b> | <b>A/G</b> | <b>rs7585356</b> | <b>1</b>  | <b>0.142877</b> | <b>0</b>     | <b>LOC100128203  BARD1</b> | <b>-29518  -956</b> | <b>G</b> | <b>0.733</b> | <b>0.685</b> |

SNP, single nucleotide polymorphism; *BARD1*, *BRCAl associated RING domain 1*; LD, linkage disequilibrium; CHB, Han Chinese in Beijing, China.

**Supplemental Table 2.** Demographic information of neuroblastoma patients and controls

| Variables              | Cases (n=201) |       | Controls (n=531) |       | <i>P</i> <sup>a</sup> |
|------------------------|---------------|-------|------------------|-------|-----------------------|
|                        | No.           | %     | No.              | %     |                       |
| Age range, month       | 0-156         |       | 0.07-156         |       | 0.788                 |
| Mean ± SD              | 30.29 ± 25.40 |       | 29.73 ± 24.86    |       |                       |
| <12                    | 54            | 26.87 | 145              | 27.31 | 0.452                 |
| 12-60                  | 128           | 63.68 | 313              | 58.95 |                       |
| >60                    | 19            | 9.45  | 73               | 13.75 |                       |
| Gender                 |               |       |                  |       | 0.452                 |
| Female                 | 82            | 40.80 | 233              | 43.88 |                       |
| Male                   | 119           | 59.20 | 298              | 56.12 |                       |
| Clinical stage         |               |       |                  |       |                       |
| I                      | 50            | 24.88 |                  |       |                       |
| II                     | 54            | 26.87 |                  |       |                       |
| III                    | 34            | 16.92 |                  |       |                       |
| IV                     | 49            | 24.38 |                  |       |                       |
| 4s                     | 7             | 3.48  |                  |       |                       |
| NA                     | 7             | 3.48  |                  |       |                       |
| Site of origin         |               |       |                  |       |                       |
| Adrenal gland          | 30            | 14.93 |                  |       |                       |
| Retroperitoneal region | 50            | 24.86 |                  |       |                       |
| Mediastinum            | 80            | 39.80 |                  |       |                       |
| Other region           | 17            | 8.46  |                  |       |                       |
| NA                     | 24            | 11.94 |                  |       |                       |

<sup>a</sup> Two-sided  $\chi^2$  test for distributions between neuroblastoma patients and controls.
